# Supplementary material for: Carbon dioxide to bio-oil in a bioelectrochemical system-assisted microalgae biorefinery process
Source: Royal Society of Chemistry journal article supplement (doi:10.1039/d1se01701b), 2021-11-24
Supplement: d1se01701b1.pdf [file d1se01701b1.pdf]

### Supplementary Information

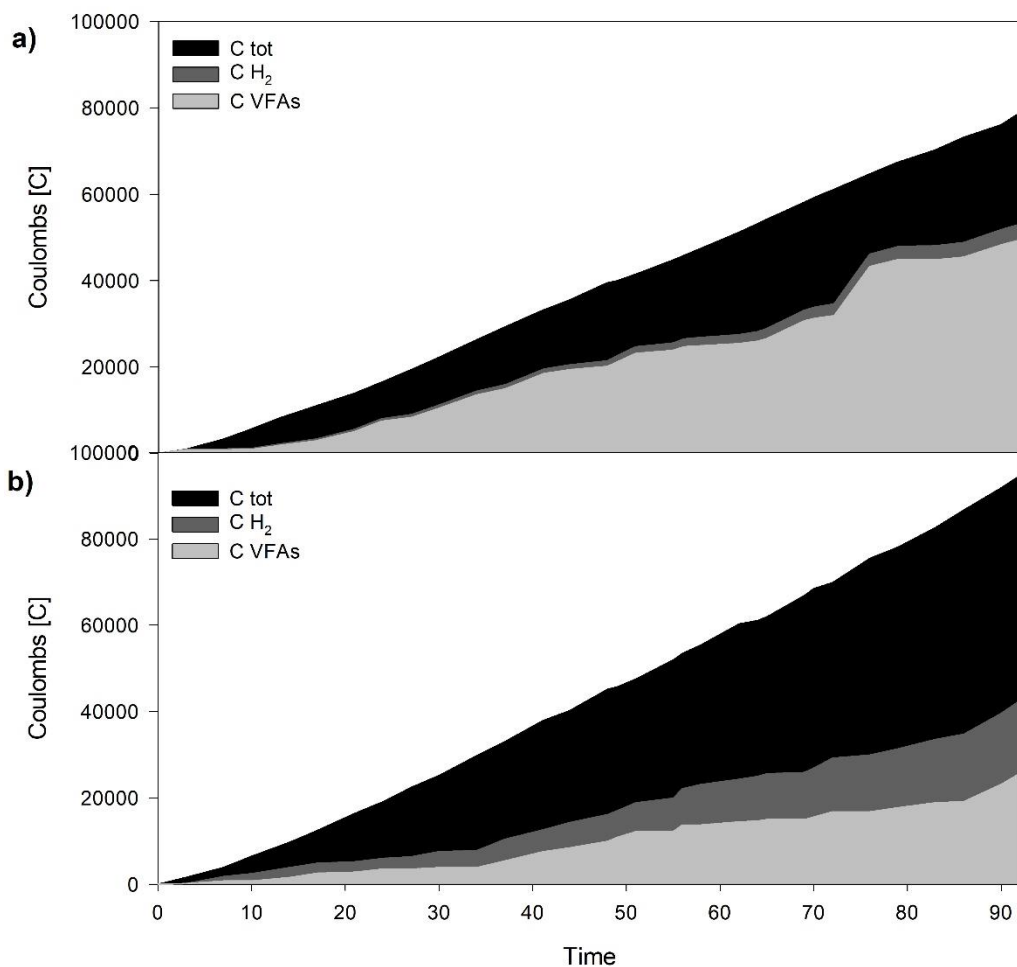

**Figure S1.** Distribution of the accumulated coulombs in products compared to total coulombs consumed over time in each reactor in the two H-type BES – a) HT1; b) HT2.

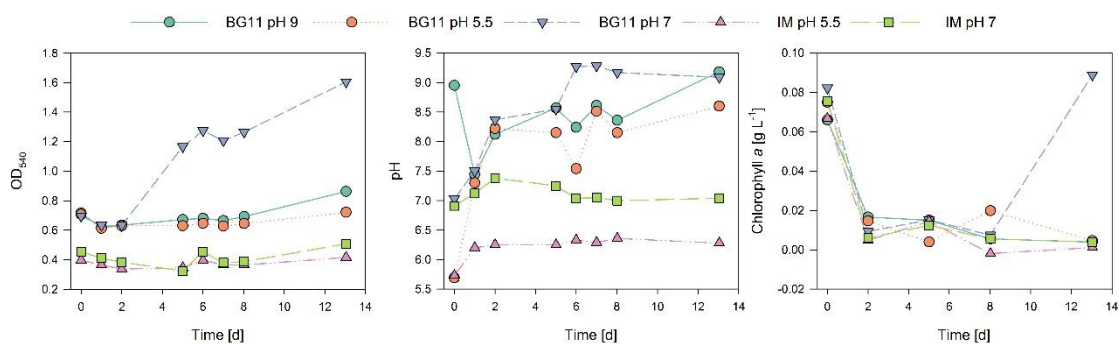

**Figure S2.** Preliminary *Auxenochlorella protothecoides* autotrophic tests under different medium and starting pH conditions.

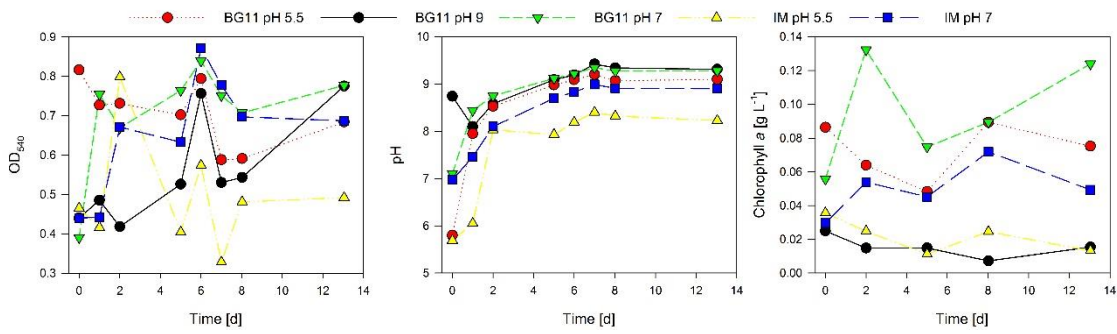

**Figure S3.** Preliminary *Auxenochlorella protothecoides* heterotrophic tests with synthetic effluent (acetate 2 g L<sup>-1</sup>) under different medium and starting pH conditions.

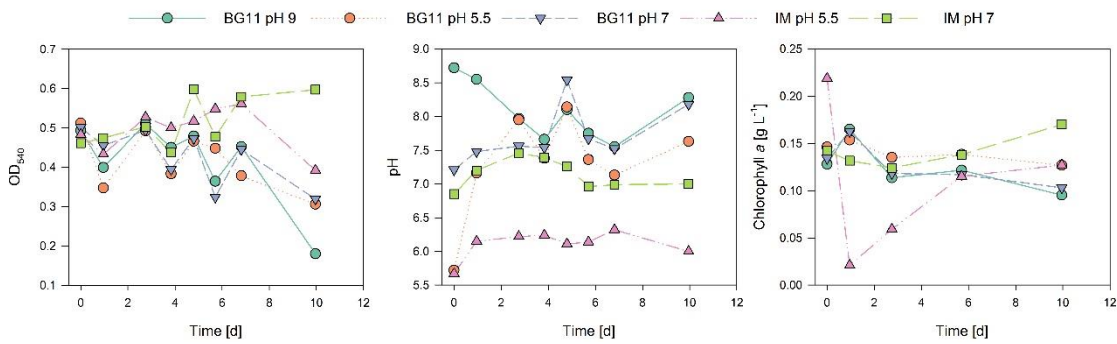

**Figure S4.** Preliminary *Chlorella vulgaris* autotrophic tests under different medium and starting pH conditions.

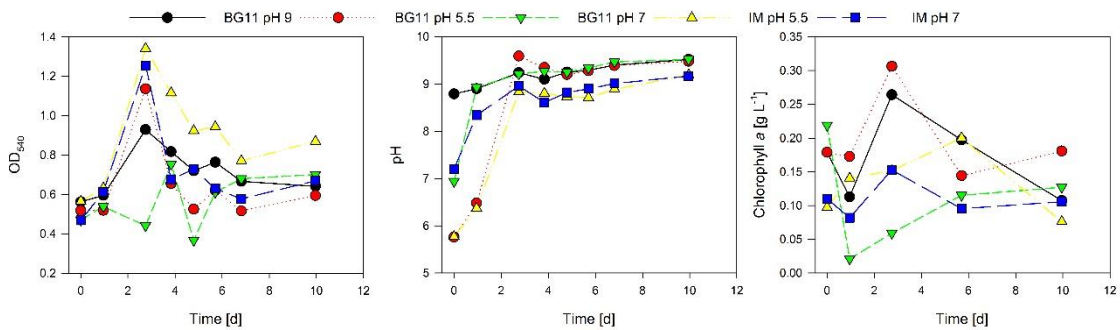

**Figure S5.** Preliminary *Chlorella vulgaris* heterotrophic tests with synthetic effluent (acetate 2 g L<sup>-1</sup>) under different medium and starting pH conditions.
